# Supplementary material
Source: publisher figshare collection journal article supplement (https://tandf.figshare.com/articles/dataset/_/8025083)

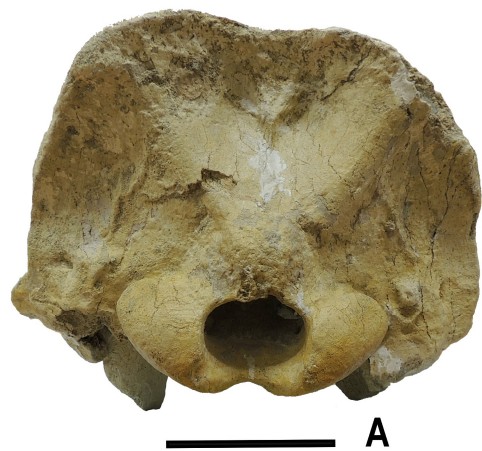

A

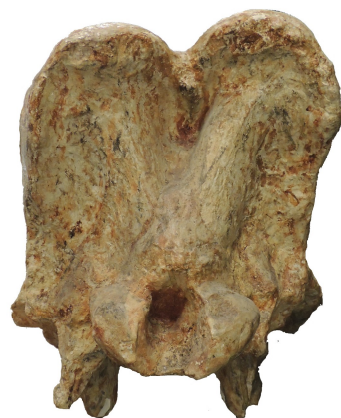

B

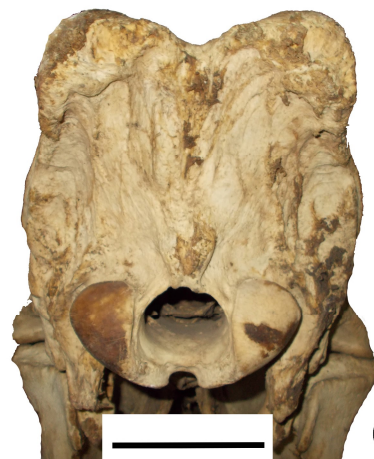

C

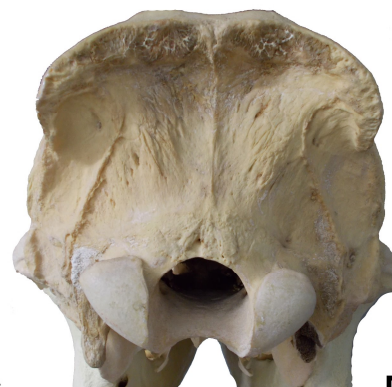

D

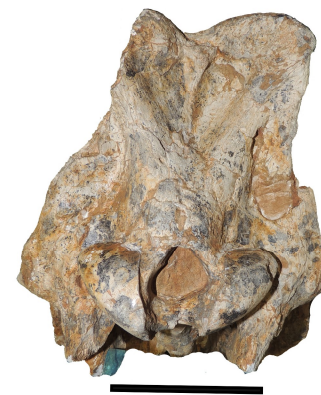

E

Supplement: Supplementary file 1 [file 1]

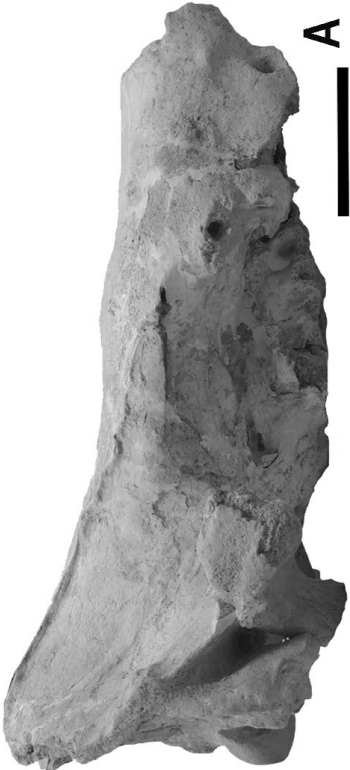

A

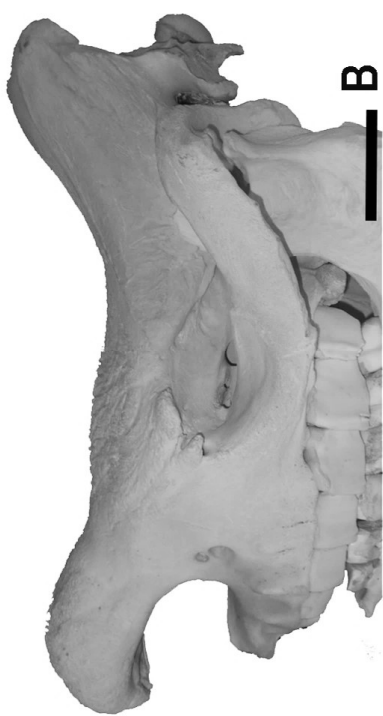

B

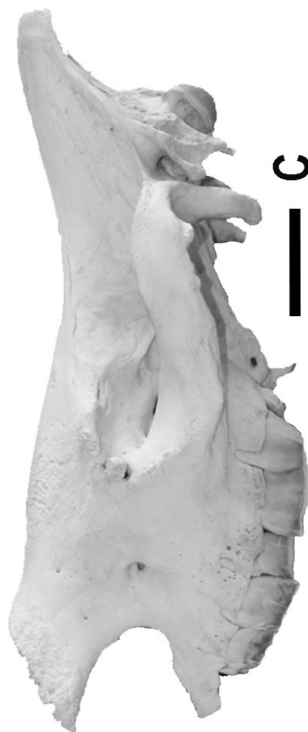

C

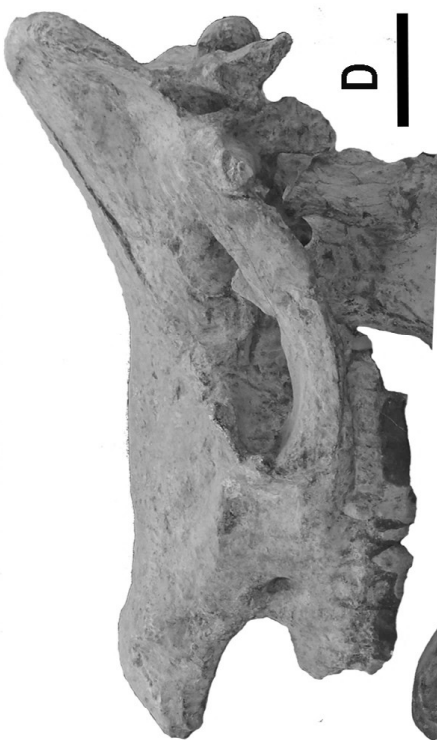

D

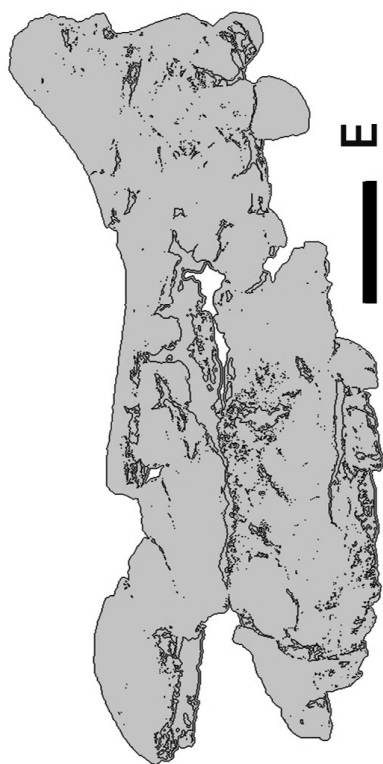

E

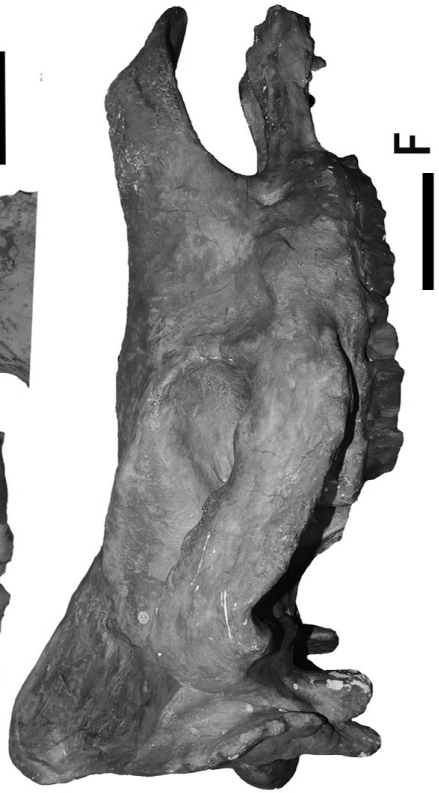

F

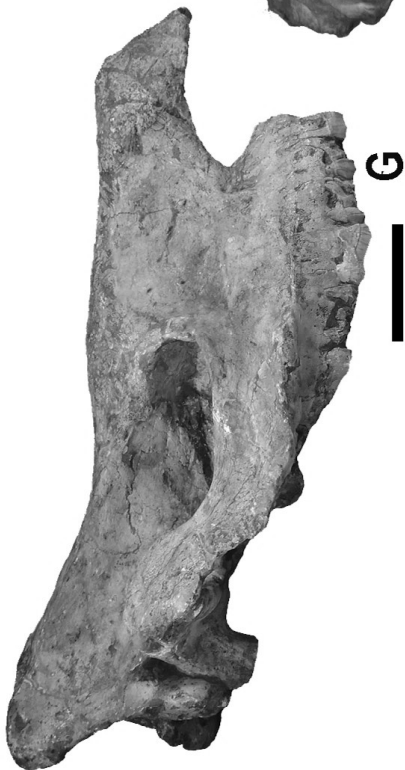

G

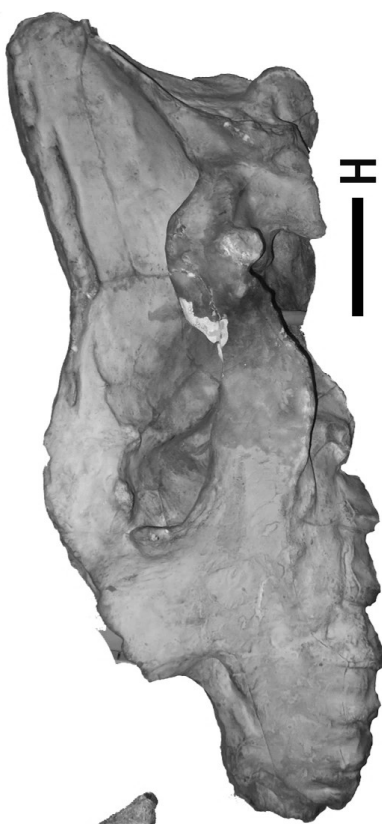

H

Supplement: Supplementary file 2 [file 1]
